# Supplementary material for: Pharmaceutical Advantages of GenoTX-407, A Combination of Extracts from Scutellaria baicalensis Root and Magnolia officinalis Bark
Source: MDPI journal article supplement (doi:10.3390/antiox9111111), 2020-11-11
Supplement: s1 [file s1]

Table S1. The weights of SBR extracts depending on different ethanol concentrations and time periods.

| Ethanol | 0%    | 20%   | 40%   | 50%   | 60%   |
|---------|-------|-------|-------|-------|-------|
| 1 h     | 13.1% | 11.3% | 10.3% | 10.6% | 10.2% |
| 2 h     | 18.2% | 13.2% | 10.5% | 10.3% | 10.3% |
| 3 h     | 18.0% | 13.3% | 9.4%  | 10.5% | 10.2% |
| 4 h     | 17.3% | 13.6% | 9.5%  | 10.2% | 10.7% |

The data indicate the ratio of relative weights to initial weights of SBR.

Table S2. The weights of MOB extracts depending on different ethanol concentrations and time periods.

| Ethanol | 0%    | 50%   | 70%   | 80%  |
|---------|-------|-------|-------|------|
| 1 h     | 12.0% | 12.3% | 11.2% | 9.1% |
| 2 h     | 12.2% | 13.4% | 11.0% | 9.2% |
| 3 h     | 12.1% | 13.2% | 11.3% | 9.5% |
| 4 h     | 12.2% | 13.1% | 11.3% | 9.3% |

The data indicate the ratio of relative weights to initial weights of MOB.

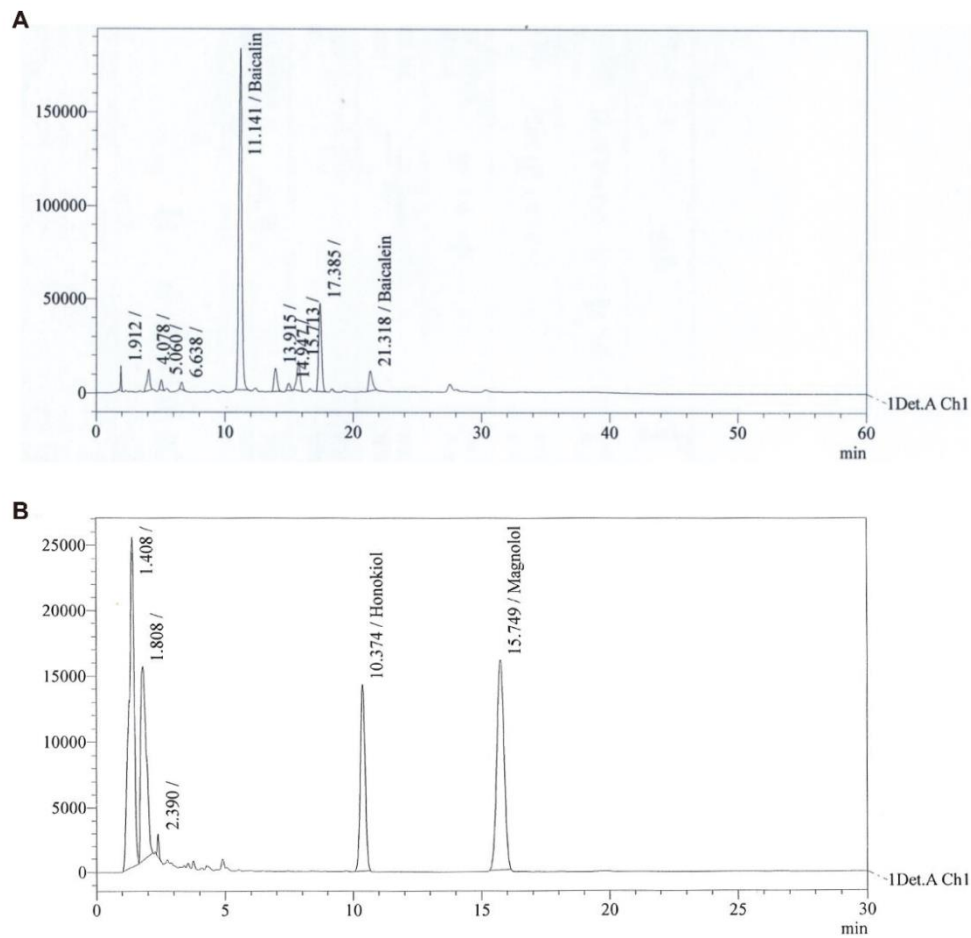

**Figure S1.** High-performance liquid chromatography of SBR (A) and MOB (B). Peaks indicate abundant baicalin in SBR and honokiol and magnolol in MOB. SBR, *Scutellaria baicalensis* root; MOB, *Magnolia officinalis* barks.

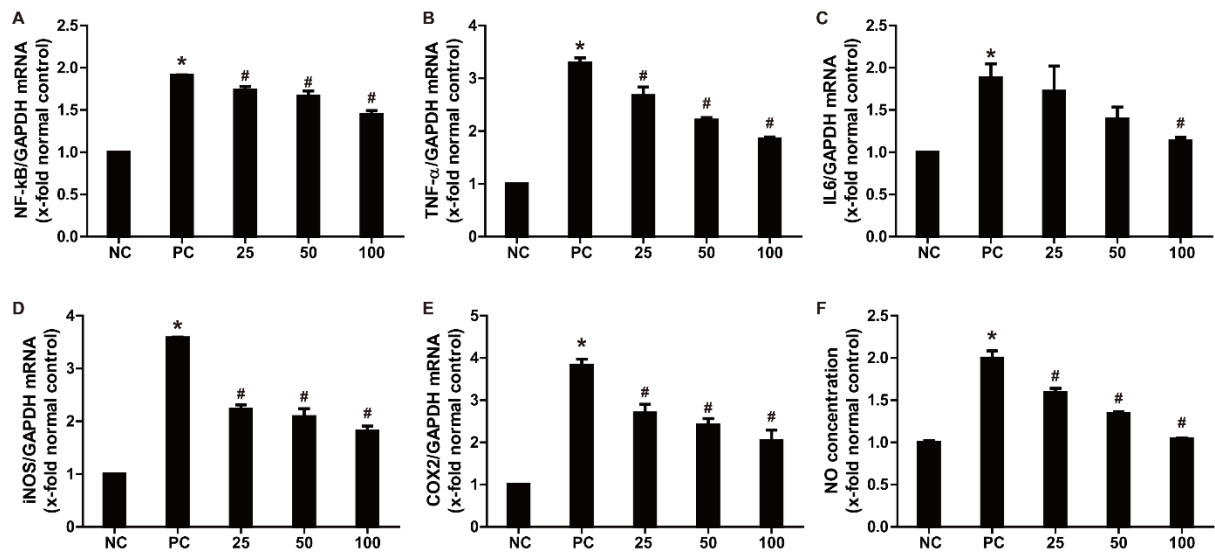

Figure S2. Anti-inflammatory activity of SBR (25, 50, and 100  $\mu\text{g/mL}$ ). Real-time PCR for checking the expression of *NF- $\kappa$ B* (A), *TNF- $\alpha$*  (B), *IL-6* (C), *iNOS* (D), and *COX2* (E) mRNA normalized against *GAPDH*, (F) Inhibitory effect on LPS-induced NO generation. \*Significantly different from normal controls ( $P < 0.05$ ). #Significantly different from positive controls ( $P < 0.05$ ). SBR, *Scutellaria baicalensis* root; LPS, lipopolysaccharide

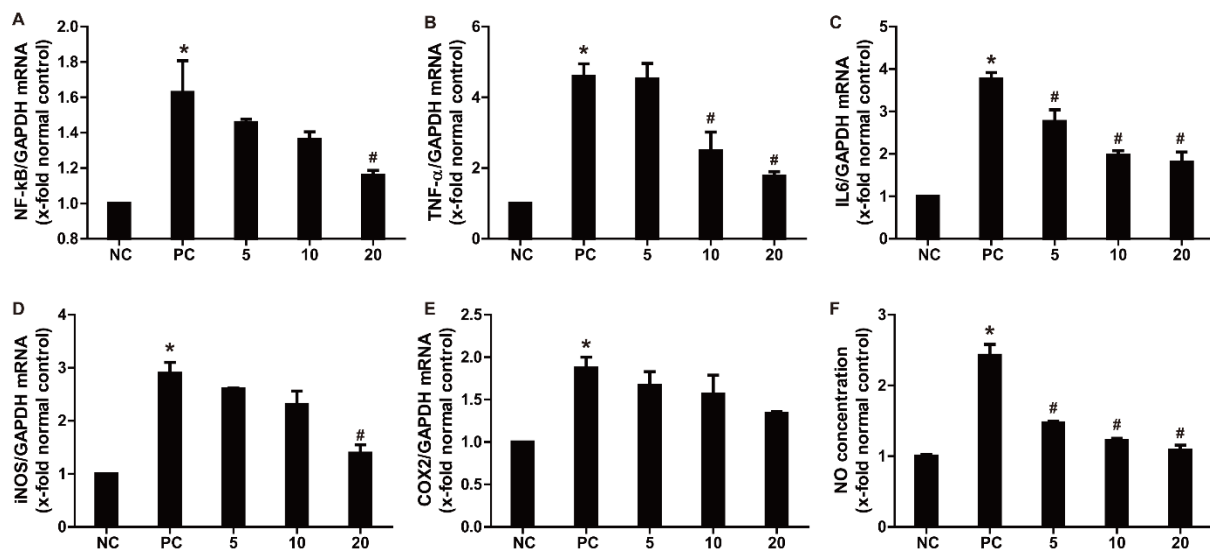

Figure S3. Anti-inflammatory activity of MOB (5, 10, and 20  $\mu\text{g/mL}$ ). Real-time PCR for checking the expression of *NF- $\kappa$ B* (A), *TNF- $\alpha$*  (B), *IL-6* (C), *iNOS* (D), and *COX2* (E) mRNA normalized against *GAPDH*. (F) Inhibitory effect on LPS-induced NO generation. \*Significantly different from normal controls ( $P < 0.05$ ). #Significantly different from positive controls ( $P < 0.05$ ). MOB, *Magnolia officinalis* barks; LPS, lipopolysaccharide

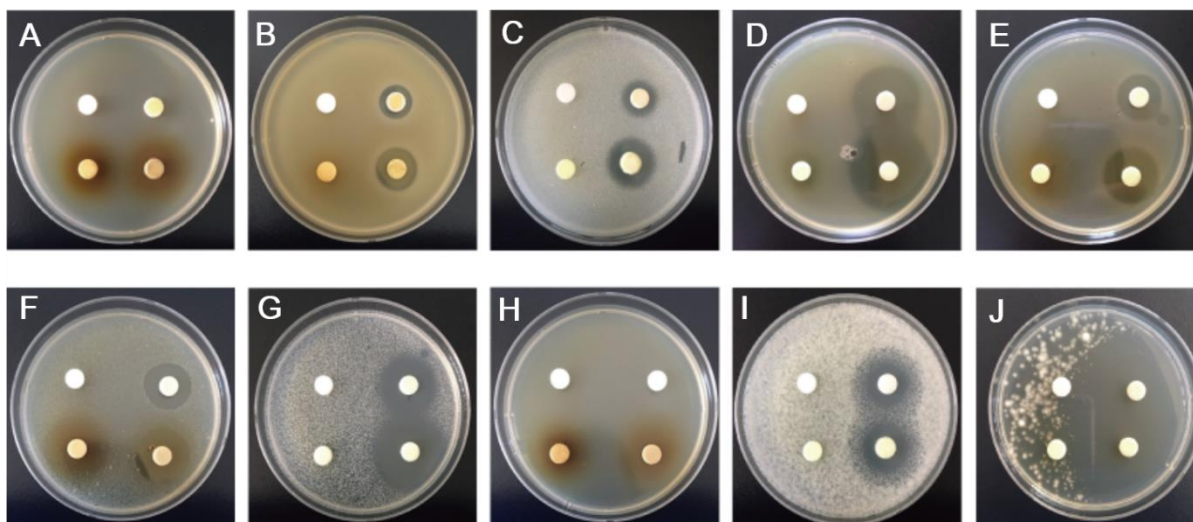

Figure S4. Antimicrobial activities of SBR, MOB, and GenoTX-407 against (A) *Escherichia coli*, (B) *Staphylococcus aureus*, (C) *Candida albicans*, (D) *Propionibacterium acnes*, (E) *Staphylococcus epidermidis*, (F) *Pseudomonas aeruginosa*, (G) *Bacillus subtilis*, (H) *Saccharomyces cerevisiae*, (I) *Aspergillus niger*, and (J) *T. rubum* determined using the agar disk diffusion method. Top: Left, DMSO; Right, SBR; Bottom: Left, MOB; Right, GenoTX-407. SBR, *Scutellaria baicalensis* root; MOB, *Magnolia officinalis* barks; GenoTX-407, combination of SBR and MOB
